# Supplementary material
Source: MDPI journal article supplement (https://www.mdpi.com/2227-9717/10/12/2608)
Supplement: s1 [file s1]

## Supplementary Materials

**Table S1.** Simulation results of the integrated system in real condition.

| No. | Stream                            | $X$  | $T$ (°C) | $P$ (kPa) | vapor fraction | $m$ (kg/s) | $h$ (kJ/kg) | $s$ (kJ·kg <sup>-1</sup> ·K <sup>-1</sup> ) |
|-----|-----------------------------------|------|----------|-----------|----------------|------------|-------------|---------------------------------------------|
| A1  | LiBr/H <sub>2</sub> O             | 0.56 | 63.62    | 5.69      | 0.00           | 1.04       | 145.16      | 0.40                                        |
| A2  | H <sub>2</sub> O                  | 0.00 | 80.00    | 5.69      | 1.00           | 0.11       | 2650.02     | 8.61                                        |
| A3  | H <sub>2</sub> O                  | 0.00 | 35.00    | 5.69      | 0.00           | 0.11       | 146.66      | 0.51                                        |
| A4  | H <sub>2</sub> O                  | 0.00 | 2.01     | 0.76      | 0.06           | 0.11       | 8.45        | 0.03                                        |
| A5  | H <sub>2</sub> O                  | 0.00 | 2.01     | 0.76      | 1.00           | 0.11       | 8.45        | 0.03                                        |
| A6  | LiBr/H <sub>2</sub> O             | 0.62 | 80.00    | 5.69      | 0.00           | 0.94       | 203.52      | 0.44                                        |
| A7  | LiBr/H <sub>2</sub> O             | 0.62 | 39.99    | 5.69      | 0.00           | 0.94       | 128.80      | 0.22                                        |
| A8  | LiBr/H <sub>2</sub> O             | 0.62 | 39.99    | 0.76      | 0.00           | 0.94       | 128.80      | 0.22                                        |
| A9  | LiBr/H <sub>2</sub> O             | 0.56 | 34.99    | 0.95      | 0.00           | 1.04       | 86.95       | 0.21                                        |
| A10 | LiBr/H <sub>2</sub> O             | 0.56 | 34.99    | 5.69      | 0.00           | 1.04       | 86.96       | 0.21                                        |
| K1  | NH <sub>3</sub> /H <sub>2</sub> O | 0.70 | 7.00     | 293       | 0.00           | 0.56       | -7818.85    | -10.97                                      |
| K2  | NH <sub>3</sub> /H <sub>2</sub> O | 0.70 | 7.49     | 3300      | 0.00           | 0.56       | -7813.20    | -10.97                                      |
| K3  | NH <sub>3</sub> /H <sub>2</sub> O | 0.70 | 12.49    | 3300      | 0.00           | 0.56       | -7789.79    | -10.88                                      |
| K4  | NH <sub>3</sub> /H <sub>2</sub> O | 0.70 | 73.12    | 3300      | 0.00           | 0.56       | -7498.86    | -9.96                                       |
| K5  | NH <sub>3</sub> /H <sub>2</sub> O | 0.98 | 109.40   | 3300      | 1.00           | 0.19       | -2815.58    | -7.02                                       |
| K6  | NH <sub>3</sub> /H <sub>2</sub> O | 0.98 | 3.63     | 293       | 0.92           | 0.19       | -3109.37    | -6.87                                       |
| K7  | NH <sub>3</sub> /H <sub>2</sub> O | 0.56 | 109.40   | 3300      | 0.00           | 0.38       | -8991.55    | -9.21                                       |
| K8  | NH <sub>3</sub> /H <sub>2</sub> O | 0.56 | 17.49    | 3300      | 0.00           | 0.38       | -9425.66    | -10.51                                      |
| K9  | NH <sub>3</sub> /H <sub>2</sub> O | 0.56 | 18.22    | 293       | 0.00           | 0.38       | -9425.66    | -10.49                                      |
| K10 | NH <sub>3</sub> /H <sub>2</sub> O | 0.70 | 17.64    | 293       | 0.30           | 0.56       | -7342.37    | -9.30                                       |
| K11 | NH <sub>3</sub> /H <sub>2</sub> O | 0.70 | 16.87    | 293       | 0.28           | 0.56       | -7365.78    | -9.38                                       |

**Table S2.** Simulation results of the integrated system in unavoidable condition.

| No. | Stream                            | $X$  | $T$ (°C) | $P$ (kPa) | vapor fraction | $m$ (kg/s) | $h$ (kJ/kg) | $s$ (kJ·kg <sup>-1</sup> ·K <sup>-1</sup> ) |
|-----|-----------------------------------|------|----------|-----------|----------------|------------|-------------|---------------------------------------------|
| A1  | LiBr/H <sub>2</sub> O             | 0.56 | 59.16    | 4.82      | 0.00           | 0.53       | 136.00      | 0.37                                        |
| A2  | H <sub>2</sub> O                  | 0.00 | 86.99    | 4.82      | 1.00           | 0.09       | 2663.41     | 8.72                                        |
| A3  | H <sub>2</sub> O                  | 0.00 | 31.99    | 4.82      | 0.00           | 0.09       | 134.06      | 0.46                                        |
| A4  | H <sub>2</sub> O                  | 0.00 | 2.01     | 0.76      | 0.05           | 0.09       | 8.45        | 0.03                                        |
| A5  | H <sub>2</sub> O                  | 0.00 | 2.01     | 0.76      | 1.00           | 0.09       | 8.45        | 0.03                                        |
| A6  | LiBr/H <sub>2</sub> O             | 0.67 | 86.99    | 4.82      | 0.00           | 0.44       | 247.11      | 0.45                                        |
| A7  | LiBr/H <sub>2</sub> O             | 0.67 | 34.09    | 4.82      | 0.00           | 0.44       | 156.94      | 0.18                                        |
| A8  | LiBr/H <sub>2</sub> O             | 0.67 | 34.09    | 0.76      | 0.00           | 0.44       | 156.94      | 0.18                                        |
| A9  | LiBr/H <sub>2</sub> O             | 0.56 | 32.09    | 0.80      | 0.00           | 0.53       | 81.15       | 0.20                                        |
| A10 | LiBr/H <sub>2</sub> O             | 0.56 | 32.09    | 4.82      | 0.00           | 0.53       | 85.16       | 0.21                                        |
| K1  | NH <sub>3</sub> /H <sub>2</sub> O | 0.70 | 4.00     | 261       | 0.00           | 0.39       | -7832.95    | -11.02                                      |
| K2  | NH <sub>3</sub> /H <sub>2</sub> O | 0.70 | 4.42     | 3300      | 0.00           | 0.39       | -7827.55    | -11.02                                      |
| K3  | NH <sub>3</sub> /H <sub>2</sub> O | 0.70 | 9.42     | 3300      | 0.00           | 0.39       | -7804.17    | -10.93                                      |
| K4  | NH <sub>3</sub> /H <sub>2</sub> O | 0.70 | 70.33    | 3300      | 0.00           | 0.39       | -7512.71    | -10.00                                      |
| K5  | NH <sub>3</sub> /H <sub>2</sub> O | 0.97 | 116.40   | 3300      | 1.00           | 0.16       | -2895.44    | -6.92                                       |
| K6  | NH <sub>3</sub> /H <sub>2</sub> O | 0.97 | 4.85     | 261       | 0.91           | 0.16       | -3235.62    | -6.86                                       |
| K7  | NH <sub>3</sub> /H <sub>2</sub> O | 0.51 | 116.40   | 3300      | 0.00           | 0.23       | -9529.56    | -9.03                                       |
| K8  | NH <sub>3</sub> /H <sub>2</sub> O | 0.51 | 11.42    | 3300      | 0.00           | 0.23       | -10020.52   | -10.50                                      |
| K9  | NH <sub>3</sub> /H <sub>2</sub> O | 0.51 | 12.18    | 261       | 0.00           | 0.23       | -10020.52   | -10.48                                      |
| K10 | NH <sub>3</sub> /H <sub>2</sub> O | 0.70 | 17.82    | 261       | 0.35           | 0.39       | -7263.45    | -9.01                                       |
| K11 | NH <sub>3</sub> /H <sub>2</sub> O | 0.70 | 16.91    | 261       | 0.34           | 0.39       | -7286.84    | -9.09                                       |

**Table S3.** Simulation results of the integrated system in ideal condition.

| No. | Stream                            | $X$  | $T$ (°C) | $P$ (kPa) | vapor fraction | $m$ (kg/s) | $h$ (kJ/kg) | $s$ (kJ·kg <sup>-1</sup> ·K <sup>-1</sup> ) |
|-----|-----------------------------------|------|----------|-----------|----------------|------------|-------------|---------------------------------------------|
| A1  | LiBr/H <sub>2</sub> O             | 0.56 | 56.01    | 4.31      | 0.00           | 0.41       | 129.54      | 0.35                                        |
| A2  | H <sub>2</sub> O                  | 0.00 | 90.00    | 4.31      | 1.00           | 0.08       | 2669.18     | 8.79                                        |
| A3  | H <sub>2</sub> O                  | 0.00 | 29.99    | 4.31      | 0.00           | 0.08       | 125.70      | 0.44                                        |
| A4  | H <sub>2</sub> O                  | 0.00 | 2.01     | 0.76      | 0.05           | 0.08       | 8.45        | 0.03                                        |
| A5  | H <sub>2</sub> O                  | 0.00 | 2.01     | 0.76      | 1.00           | 0.08       | 8.45        | 0.03                                        |
| A6  | LiBr/H <sub>2</sub> O             | 0.69 | 90.00    | 4.31      | 0.00           | 0.33       | 268.25      | 0.45                                        |
| A7  | LiBr/H <sub>2</sub> O             | 0.69 | 30.21    | 4.31      | 0.00           | 0.33       | 171.21      | 0.16                                        |
| A8  | LiBr/H <sub>2</sub> O             | 0.69 | 32.84    | 0.76      | 0.00           | 0.33       | 175.35      | 0.18                                        |
| A9  | LiBr/H <sub>2</sub> O             | 0.56 | 30.11    | 0.71      | 0.00           | 0.41       | 77.20       | 0.18                                        |
| A10 | LiBr/H <sub>2</sub> O             | 0.56 | 30.11    | 4.31      | 0.00           | 0.41       | 77.20       | 0.18                                        |
| K1  | NH <sub>3</sub> /H <sub>2</sub> O | 0.70 | 2.00     | 241       | 0.00           | 0.33       | -7842.34    | -11.05                                      |
| K2  | NH <sub>3</sub> /H <sub>2</sub> O | 0.70 | 2.36     | 3300      | 0.00           | 0.33       | -7837.19    | -11.05                                      |
| K3  | NH <sub>3</sub> /H <sub>2</sub> O | 0.70 | 7.36     | 3300      | 0.00           | 0.33       | -7813.82    | -10.97                                      |
| K4  | NH <sub>3</sub> /H <sub>2</sub> O | 0.70 | 69.10    | 3300      | 0.00           | 0.33       | -7518.84    | -10.02                                      |
| K5  | NH <sub>3</sub> /H <sub>2</sub> O | 0.97 | 119.40   | 3300      | 1.00           | 0.14       | -2937.94    | -6.88                                       |
| K6  | NH <sub>3</sub> /H <sub>2</sub> O | 0.97 | 3.68     | 241       | 0.90           | 0.14       | -3310.21    | -6.88                                       |
| K7  | NH <sub>3</sub> /H <sub>2</sub> O | 0.50 | 119.40   | 3300      | 0.00           | 0.19       | -9743.27    | -8.96                                       |
| K8  | NH <sub>3</sub> /H <sub>2</sub> O | 0.50 | 7.46     | 3300      | 0.00           | 0.19       | -10264.83   | -10.52                                      |
| K9  | NH <sub>3</sub> /H <sub>2</sub> O | 0.50 | 8.23     | 241       | 0.00           | 0.19       | -10264.83   | -10.50                                      |
| K10 | NH <sub>3</sub> /H <sub>2</sub> O | 0.70 | 16.81    | 241       | 0.37           | 0.33       | -7243.55    | -8.92                                       |
| K11 | NH <sub>3</sub> /H <sub>2</sub> O | 0.70 | 15.86    | 241       | 0.35           | 0.33       | -7266.92    | -9.00                                       |

**Table S4.** Splitting on the exogenous destruction (kW).

| kth component | $\dot{E}_{D,k}^{EX}$ | rth component | $\dot{E}_{D,k}^{EX,r}$ | $\dot{E}_{D,k}^{AV, EX, r}$ | $\dot{E}_{D,k}^{UN, EX, r}$ |
|---------------|----------------------|---------------|------------------------|-----------------------------|-----------------------------|
| Generator 1   | 5.63                 | Condenser     | -1.08                  | -0.85                       | -0.24                       |
|               |                      | Evaporator    | 0.80                   | 0.40                        | 0.40                        |
|               |                      | Absorber      | -0.04                  | -0.04                       | <0.01                       |
|               |                      | Heatx         | 0.03                   | 0.03                        | <0.01                       |
|               |                      | Pump 2        | 0.06                   | 0.03                        | 0.02                        |
|               |                      | Generator 2   | 0.36                   | 2.02                        | -1.66                       |
|               |                      | Turbine       | 2.11                   | 1.05                        | 1.06                        |
|               |                      | HTR           | 0.28                   | 0.15                        | 0.13                        |
|               |                      | LTR           | <0.01                  | <0.01                       | <0.01                       |
|               |                      | mexo          | 3.12                   |                             |                             |
| Condenser     | 2.23                 | Generator 1   | -0.26                  | -0.25                       | <0.01                       |
|               |                      | Evaporator    | 0.49                   | 0.12                        | 0.37                        |
|               |                      | Absorber      | <0.01                  | <0.01                       | <0.01                       |
|               |                      | Heatx         | <0.01                  | <0.01                       | <0.01                       |
|               |                      | Pump 2        | 0.03                   | 0.01                        | 0.02                        |
|               |                      | Generator 2   | 0.22                   | 0.05                        | 0.16                        |
|               |                      | Turbine       | 1.31                   | 0.33                        | 0.98                        |
|               |                      | HTR           | 0.16                   | 0.04                        | 0.12                        |
|               |                      | LTR           | <0.01                  | <0.01                       | <0.01                       |
|               |                      | mexo          | 0.27                   |                             |                             |
| Evaporator    | 0.48                 | Generator 1   | <0.01                  | <0.01                       | <0.01                       |
|               |                      | Condenser     | <0.01                  | <0.01                       | <0.01                       |
|               |                      | Absorber      | <0.01                  | <0.01                       | <0.01                       |
|               |                      | Heatx         | <0.01                  | <0.01                       | <0.01                       |
|               |                      | Pump 2        | 0.04                   | 0.02                        | 0.02                        |
|               |                      | Generator 2   | -1.24                  | -3.08                       | 1.83                        |
|               |                      | Turbine       | 1.56                   | 0.90                        | 0.66                        |
|               |                      | HTR           | 0.31                   | 0.31                        | <0.01                       |
|               |                      | LTR           | <0.01                  | <0.01                       | <0.01                       |
|               |                      | mexo          | -0.17                  |                             |                             |
| Absorber      | 1.16                 | Generator 1   | -2.78                  | -0.43                       | -2.35                       |
|               |                      | Condenser     | -1.57                  | 1.86                        | -3.44                       |
|               |                      | Evaporator    | 1.03                   | 0.21                        | 0.81                        |
|               |                      | Heatx         | 0.10                   | 0.10                        | <0.01                       |
|               |                      | Pump 2        | 0.05                   | 0.01                        | 0.04                        |
|               |                      | Generator 2   | 0.45                   | 5.07                        | -4.61                       |
|               |                      | Turbine       | 2.73                   | 0.57                        | 2.16                        |

|             |      |             |       |       |       |
|-------------|------|-------------|-------|-------|-------|
|             |      | HTR         | 0.33  | 0.07  | 0.26  |
|             |      | LTR         | <0.01 | <0.01 | <0.01 |
|             |      | mexo        | 0.81  |       |       |
| Heatx       | 0.69 | Generator 1 | -0.05 | -0.63 | 0.58  |
|             |      | Condenser   | 0.30  | -0.03 | 0.33  |
|             |      | Evaporator  | 0.14  | 0.01  | 0.12  |
|             |      | Absorber    | -0.27 | -0.27 | <0.01 |
|             |      | Pump 2      | 0.01  | <0.01 | 0.01  |
|             |      | Generator 2 | 0.06  | 0.01  | 0.06  |
|             |      | Turbine     | 0.36  | 0.04  | 0.33  |
|             |      | HTR         | 0.04  | <0.01 | 0.04  |
|             |      | LTR         | <0.01 | <0.01 | <0.01 |
|             |      | mexo        | 0.10  |       |       |
| Pump 2      | 0.13 | Generator 1 | 0     | 0     | 0     |
|             |      | Condenser   | 0     | 0     | 0     |
|             |      | Evaporator  | 0.01  | <0.01 | 0.01  |
|             |      | Absorber    | 0     | 0     | 0     |
|             |      | Heatx       | 0     | 0     | 0     |
|             |      | Generator 2 | 0.08  | 0.04  | 0.04  |
|             |      | Turbine     | 0.03  | 0.02  | 0.01  |
|             |      | HTR         | <0.01 | <0.01 | <0.01 |
|             |      | LTR         | <0.01 | <0.01 | <0.01 |
|             |      | mexo        | 0.02  |       |       |
| Generator 2 | 5.91 | Generator 1 | 0     | 0     | 0     |
|             |      | Condenser   | 0     | 0     | 0     |
|             |      | Evaporator  | 0.78  | -0.22 | 1.00  |
|             |      | Absorber    | 0     | 0     | 0     |
|             |      | Heatx       | 0     | 0     | 0     |
|             |      | Pump 2      | 0.08  | 0.01  | 0.07  |
|             |      | Turbine     | 2.63  | 0.57  | 2.06  |
|             |      | HTR         | 0.89  | 0.89  | <0.01 |
|             |      | LTR         | <0.01 | <0.01 | <0.01 |
|             |      | mexo        | 1.53  |       |       |
| Turbine     | 2.11 | Generator 1 | 0     | 0     | 0     |
|             |      | Condenser   | 0     | 0     | 0     |
|             |      | Evaporator  | -0.16 | -0.54 | 0.38  |
|             |      | Absorber    | 0     | 0     | 0     |
|             |      | Heatx       | 0     | 0     | 0     |
|             |      | Pump 2      | 0.03  | 0.01  | 0.02  |
|             |      | Generator 2 | 0.43  | 0.02  | 0.40  |
|             |      | HTR         | <0.01 | <0.01 | <0.01 |
|             |      | LTR         | <0.01 | <0.01 | <0.01 |
|             |      | mexo        | 1.81  |       |       |
| HTR         | 1.89 | Generator 1 | 0     | 0     | 0     |
|             |      | Condenser   | 0     | 0     | 0     |
|             |      | Evaporator  | -0.25 | -0.66 | 0.42  |
|             |      | Absorber    | 0     | 0     | 0     |
|             |      | Heatx       | 0     | 0     | 0     |
|             |      | Pump 2      | 0.01  | -0.01 | 0.02  |
|             |      | Generator 2 | 1.02  | -2.19 | 3.21  |
|             |      | Turbine     | 1.03  | 0.18  | 0.85  |
|             |      | LTR         | <0.01 | <0.01 | <0.01 |
|             |      | mexo        | 0.08  |       |       |
| LTR         | 0.02 | Generator 1 | 0     | 0     | 0     |
|             |      | Condenser   | 0     | 0     | 0     |
|             |      | Evaporator  | <0.01 | <0.01 | <0.01 |
|             |      | Absorber    | 0     | 0     | 0     |
|             |      | Heatx       | 0     | 0     | 0     |
|             |      | Pump 2      | <0.01 | <0.01 | <0.01 |
|             |      | Generator 2 | <0.01 | <0.01 | <0.01 |
|             |      | Turbine     | <0.01 | <0.01 | <0.01 |
|             |      | HTR         | <0.01 | <0.01 | <0.01 |
|             |      | mexo        | 0.02  |       |       |
